# Supplementary material for: Improved Inhibitor Screening Experiments by Comparative Analysis of Simulated Enzyme Progress Curves
Source: PLoS One. 2012 Oct 10;7(10):e46764. doi: 10.1371/journal.pone.0046764 (PMC3468632; doi:10.1371/journal.pone.0046764)
Supplement: Equations S1 — Equations used in the simulation tool. (PDF) [file pone.0046764.s001.pdf]

## Supplement

### Equations S1

$$V = \frac{d[P]}{dt} = -\frac{d[S]}{dt} = \frac{k_{\text{cat}}[S][E_{\text{tot}}]}{[S] + K_m}$$

**Equation 1.** The Michaelis-Menten rate-law for initial reaction velocity.  $k_{\text{cat}}$ , turnover number;  $[S]$ , substrate concentration,  $[E_{\text{tot}}]$ , total enzyme concentration;  $K_m$ , Michaelis constant.

$$V = \frac{k_{\text{cat}}[S][E_{\text{tot}}]}{[S] + K_m(1 + \frac{[P]}{K_{\text{mP}}})} - \frac{k_{-2}[P][E_{\text{tot}}]}{[P] + K_{\text{mp}}(1 + \frac{[S]}{K_m})}$$

**Equation 2.** The reversible Michaelis-Menten rate-law for initial reaction velocity.  $k_{\text{cat}}$ , turnover number for the forward reaction;  $[S]$ , substrate concentration,  $[E_{\text{tot}}]$ , total enzyme concentration;  $[P]$ , product concentration;  $K_m$ , substrate concentration giving  $V=0.5V_{\text{max}}$  in forward direction at  $[P]=0$ ;  $K_{\text{mp}}$ , product concentration giving  $V=0.5V_{\text{max}}$  in reverse direction at  $[S]=0$ ;  $k_{-2}$ , turnover number for the reverse reaction

$$[P]_{i+\Delta t} = [P]_i + \frac{d[P]_i}{dt} \Delta t$$

**Equation 3.** Equation for numeric integration of the initial reaction velocity ( $V_o$ ).  $[P]_{i+\Delta t}$ , product concentration at time point  $i+\Delta t$ ;  $[P]_i$ , product concentration at time point  $i$ ;

$\frac{d[P]_i}{dt}$ , reaction velocity at time point  $i$ ;  $\Delta t$ , the integration time step.

$$[E] = [E_o] \left(\frac{1}{2}\right)^{t/t_{(1/2)}}$$

**Equation 4.** Equation expressing the decay of enzyme as a function of time with respect to its half-life.  $[E_o]$ , enzyme concentration at time zero;  $t$ , time;  $t_{(1/2)}$ , enzyme half-life.

$$V = \frac{k_{\text{cat}}[S][E_{\text{tot}}]}{[S] + K_m(1 + \frac{[P]}{K_{\text{mP}}} + \frac{[I]}{K_{\text{ic}}})} - \frac{k_{-2}[P][E_{\text{tot}}]}{[P] + K_{\text{mp}}(1 + \frac{[S]}{K_m} + \frac{[I]}{K_{\text{ic}}})}$$

**Equation 5.** Reversible Michaelis-Menten equation with competitive inhibition.  $[I]$ , inhibitor concentration;  $K_{\text{ic}}$ , enzyme-inhibitor dissociation constant for competitive inhibition; other notations as in equation 2.

## Equations S1

$$V = \frac{k_{\text{cat}}[S][E_{\text{tot}}]}{[S](1 + \frac{[I]}{K_{\text{iu}}}) + K_{\text{m}}(1 + \frac{[P]}{K_{\text{mp}}})} - \frac{k_{-2}[P][E_{\text{tot}}]}{[P](1 + \frac{[I]}{K_{\text{iu}}}) + K_{\text{mp}}(1 + \frac{[S]}{K_{\text{m}}})}$$

**Equation 6.** Reversible Michaelis-Menten equation with uncompetitive inhibition.  $K_{\text{iu}}$ , enzyme-inhibitor dissociation constant for uncompetitive inhibition; other notations as in equation 2.

$$V = \frac{k_{\text{cat}}[S][E_{\text{tot}}]}{[S](1 + \frac{[I]}{K_{\text{iu}}}) + K_{\text{m}}(1 + \frac{[P]}{K_{\text{mp}}} + \frac{[I]}{K_{\text{ic}}})} - \frac{k_{-2}[P][E_{\text{tot}}]}{[P](1 + \frac{[I]}{K_{\text{iu}}}) + K_{\text{mp}}(1 + \frac{[S]}{K_{\text{m}}} + \frac{[I]}{K_{\text{ic}}})}$$

**Equation 7.** Reversible Michaelis-Menten equation with mixed inhibition. Notations as in equations 2 & 5-6. Note that non-competitive inhibition is obtained by setting  $K_{\text{iu}}=K_{\text{ic}}$ .

$$IC'_{50} = [I] \times \frac{[P_{\text{inh}}]}{[P_{\text{uninh}}] - [P_{\text{inh}}]}$$

**Equation 8.** Inhibitor concentration giving 50% observed inhibition.  $[P_{\text{inh}}]$ , product concentration of the inhibited reaction;  $[P_{\text{uninh}}]$ , product concentration of the uninhibited reference reaction; other notations as in equation 5. At initial reaction conditions,  $IC'_{50}$  equals  $IC_{50}$ .

$$\%Inhibition = 100 \times \left( \frac{[P_{\text{uninh}}] - [P_{\text{inh}}]}{[P_{\text{uninh}}]} \right)$$

**Equation 9.** Observed inhibition (%). Notations as in equation 8.

$$\%Substrate = 100 \times \left( \frac{[P] - [P_o]}{[S_o]} \right)$$

**Equation 10.** Degree of substrate depletion (%).  $[P]$ , accumulated product concentration;  $[P_o]$ , product concentration at time zero;  $[S_o]$ , substrate concentration at time zero.

$$IC_{50} = K_{\text{ic}} \left( 1 + \frac{[S]}{K_{\text{m}}} + \frac{[P]}{K_{\text{mp}}} \right)$$

**Equation 11\*.** Relation between  $IC_{50}$  and  $K_{\text{ic}}$  for competitive inhibition and product inhibition. Notations as in equations 2 & 5.

$$IC_{50} = K_{\text{iu}} \left( 1 + \frac{K_{\text{m}}}{[S]} + \frac{K_{\text{m}}[P]}{K_{\text{mp}}[S]} \right)$$

**Equation 12\*.** Relation between  $IC_{50}$  and  $K_{\text{iu}}$  for uncompetitive inhibition and product inhibition. Notations as in equations 2 & 6.

$$IC_{50} = \left( S + K_m + \frac{K_m[P]}{K_{mp}} \right) \div \left( \frac{[S]}{K_{iu}} + \frac{K_m}{K_{ic}} \right)$$

**Equation 13\***. Relation between  $IC_{50}$  and  $K_i$  values for mixed inhibition and product inhibition. Notations as in equations 2 & 5-6.

\*Equations 11-13 were deduced by setting  $0.5V=V(IC_{50})$  with the expression for  $V$  from equation 2 to the left and the expression for  $V$  (with  $[I]$  set to  $IC_{50}$ ) from each of the equations 5-7 to the right. This gave 3 equations which were solved for  $IC_{50}$ , similar to Cheng and Prusoff <sup>1</sup>.

## References

1. Cheng, Y. & Prusoff, W.H. Relationship between the inhibition constant ( $K_i$ ) and the concentration of inhibitor which causes 50 per cent inhibition ( $I_{50}$ ) of an enzymatic reaction. *Biochem Pharmacol* **22**, 3099-3108 (1973).
